# Supplementary material
Source: publisher site journal article supplement (https://www.dovepress.com/get_supplementary_file.php?f=418773.docx)
Supplement: Supplementary file 1 [file get_supplementary_file.php]

**Supplementary 1.** Subject Background and Self-assessment of the Experts

| **General information** | | | | | | | **Score for the basis of judgment a** | | | | | **Familiarity with the content b** |
| --- | --- | --- | --- | --- | --- | --- | --- | --- | --- | --- | --- | --- |
| N | Gender | Age | Professional title | Educational background | Field of work | Work  experience | Practical experience | Theoretical analysis | | Reference material | Intuitive feeling | Expert self-  evaluation |
| 1 | female | 40 | sub-senior | doctor | Methodology of clinical Research of Chinese medicine | 10 | 1 | 2 | 2 | | 2 | 2 |
| 2 | female | 32 | intermediate | master | Psychological Assessment/psychotherapy | 5 | 3 | 2 | 2 | | 1 | 5 |
| 3 | female | 58 | senior | bachelor | Hematology | 35 | 3 | 2 | 2 | | 1 | 5 |
| 4 | female | 42 | sub-senior | bachelor | Nursing of hematology / Nursing education | 23 | 3 | 2 | 1 | | 2 | 5 |
| 5 | male | 35 | sub-senior | doctor | Hematology | 10 | 3 | 3 | 2 | | 1 | 5 |
| 6 | female | 41 | intermediate | bachelor | Nursing of hematology / Nursing management | 15 | 3 | 2 | 2 | | 3 | 5 |

a Score for the basis of judgment：High-3; Medium-2; Low-1

b Familiarity with the content:: very familiar -5; relatively familiar -4; generally familiar -3; not very familiar -2; unfamiliar -1

**Supplementary 2.** Expert opinions and amendments

| **Original items** | **Expert opinions** | **Revised items** |
| --- | --- | --- |
| During the last 2 weeks, I felt heart palpitations and flustered. | It is recommended to add the the symptom of "chest tightness". | During the last 2 weeks, I felt chest tightness and/or heart palpitations and flustered. |
| During the last 2 weeks, I have some defecation problems (such as: diarrhea, constipation, urine occult blood, melena, etc.). | "urine occult blood " is suggested to be changed to "hematuria". | I have some defecation problems (such as diarrhea, constipation, hematuria, melena, etc.). |
| During the last 2 weeks, I have had sleep problems (such as difficulty falling asleep, restless sleep at night, light sleep and multiple dreams, wakefulness during sleep, etc.). | It is recommended to add the the symptom of "early awakening". | During the last 2 weeks, I have had sleep problems (such as difficulty falling asleep, restless sleep at night, light sleep and multiple dreams, wakefulness during sleep, early awakening etc.). |
| Aplastic anemia causes my diminution of vision and affects my life. | "diminution of vision” is suggested to be changed to "blurred vision". | Aplastic anemia makes my vision blurred and affects my life. |
| Aplastic anemia and treatment made me disuse myatrophy (muscle atrophy, leg thinner) and affected my life. | " disuse myatrophy " is suggested to be changed to " weakened my limbs ". | Aplastic anemia and bedridden have weakened my limbs and affected my life. |
| I feel down or suffering due to illness. | It is recommended to add the symptom description of "unhappy" | I feel down, unhappy or suffering due to illness. |
| Aplastic anemia and treatment made my waist and knees sore, night sweats, and weakness. | Experts suggest that the time limit should be clearly defined. The symptoms of the physiological dimension are recalled in the last 2 weeks, the emotional experience of the psychological dimension is recalled in the last 1 week, and the long-term effects are recalled since the illness. | During the last 2 weeks, aplastic anemia and treatment made my waist and knees sore, night sweats, and weakness. |
| Aplastic anemia and treatment caused abnormalities in my blood pressure and blood sugar. | During the last 2 weeks, aplastic anemia and treatment caused abnormalities in my blood pressure and blood sugar. |
| Aplastic anemia and treatment make my body function abnormal (such as abnormal liver and kidney function). | During the last 2 weeks, aplastic anemia and treatment make my body function abnormal (such as abnormal liver and kidney function). |
| I get angry/irritable easily. | Since the illness，I get angry/irritable easily. |
| I felt broken and hopeless because of the disease, and even wanted to give up treatment. | During the last 1 weeks, I felt broken and hopeless because of the disease, and even wanted to give up treatment. |
| Oral ulcers, bleeding gums, and gingival hyperplasia have affected my life. | It is recommended to classify and integrate skin and mucous membrane problems and oral problems | During the last 2 weeks, bleeding gums and gingival hyperplasia have affected my life. |
| During the last 2 weeks, skin infections, ulcers, petechiae, bruises and other symptoms have affected my daily life. | During the last 2 weeks, skin and mucous infections (oral ulcer, perianal abscesses) and bleeding (peechiae, bruises) have affected my life. |
| Perianal mucosal infections (perianal abscesses, perianal mucosal ulcers) have affected my life. |
| Religious beliefs (such as Buddhism, Christianity, Islam, etc.) and inner faith (such as belief in medical treatment and self, etc.) make me believe that I will overcome the disease. | It is suggested that this item be divided into 2 items because religious belief and inner belief are different concepts. | Religious beliefs (such as Buddhism, Christianity, Islam, etc.) make me believe that I will overcome the disease.  Inner faith (such as belief in medical treatment and self, etc.) make me believe that I will overcome the disease. |
| **/** | It is recommended to add 4 items closely related to the quality of life of patients with aplastic anemia. | Since the illness, I have gradually lost weight.  Since the illness, I no longer want to communicate with the outside world.  During the last weeks, I feel breathing smoothly and everything is fine.  During the last weeks,, I felt body aches, numbness, trembling, and unspeakable discomfort. |
